# Supplementary material
Source: PubMed Central journal article supplement (PMC10592114)
Supplement: NIHMS1926870-supplement-supplementary_figures.pdf [file NIHMS1926870-supplement-supplementary_figures.pdf]

**A**

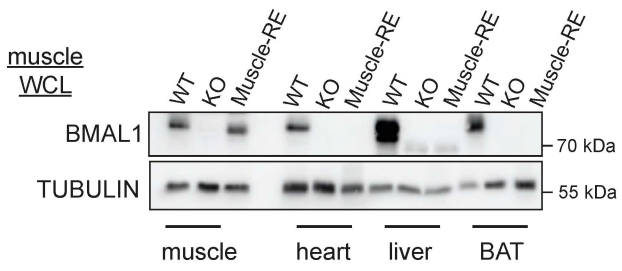

**B**

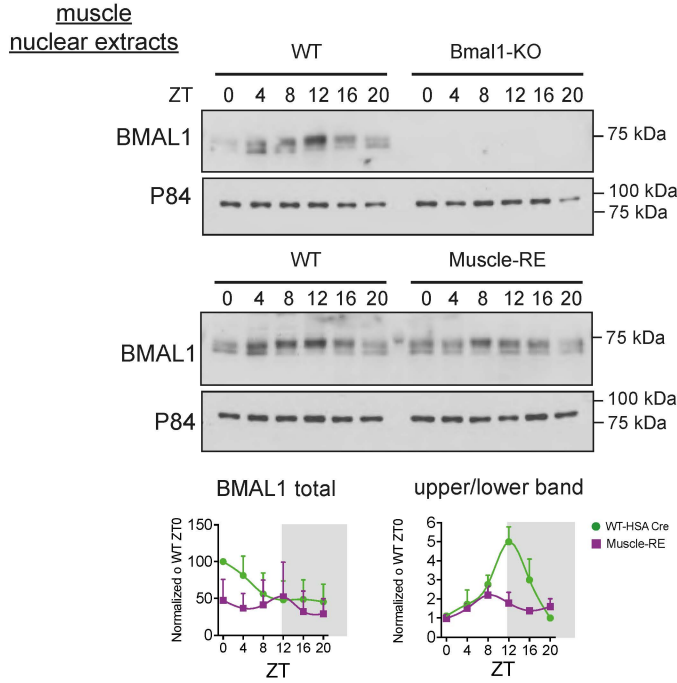

**C**

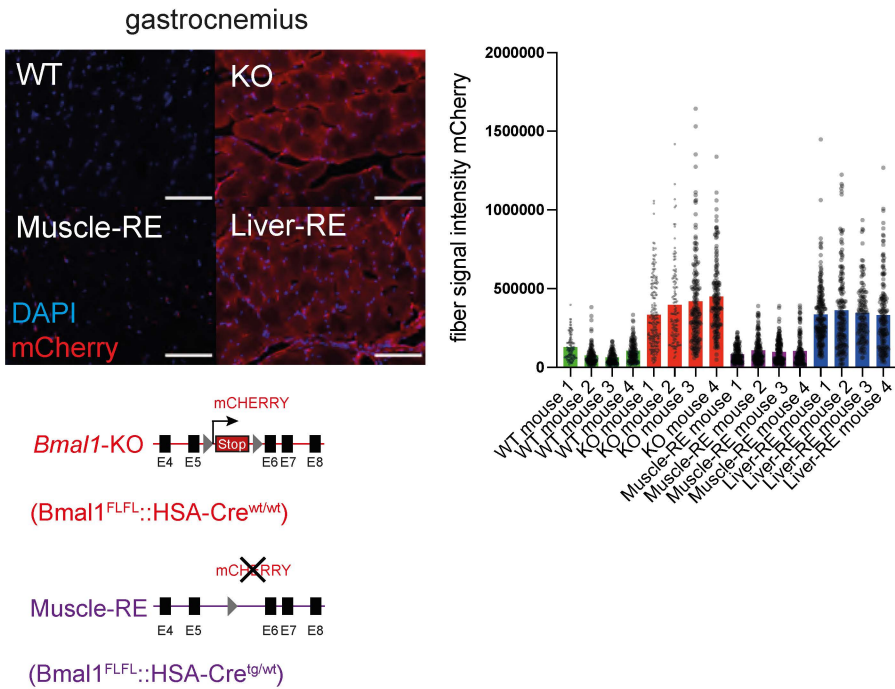

**D**

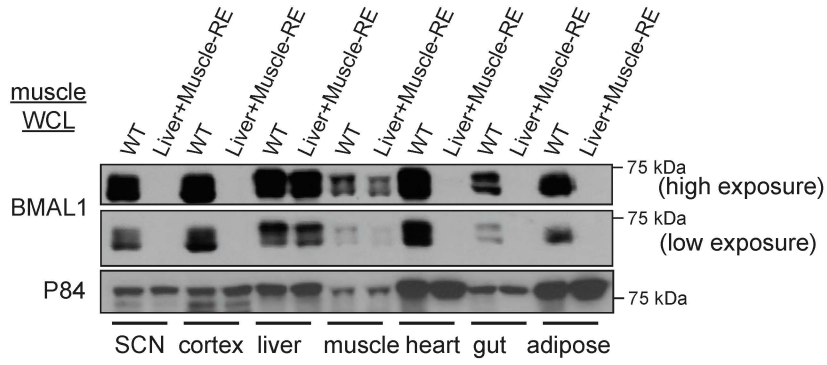

**E**

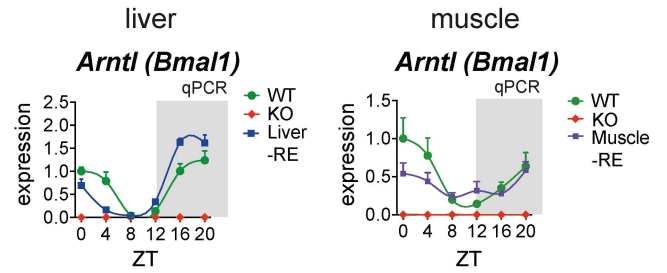

**F**

| Group          | Biodare P value |          |          |          |
|----------------|-----------------|----------|----------|----------|
|                | VO2             | VCO2     | RER      | EE       |
| WT AL-1        | 2.10E-05        | 2.10E-05 | 2.10E-05 | 2.10E-05 |
| WT AL-2        | 2.10E-05        | 2.10E-05 | 2.10E-05 | 2.10E-05 |
| WT AL-3        | 2.10E-05        | 2.10E-05 | 2.10E-05 | 2.10E-05 |
| WT AL-4        | 2.10E-05        | 2.10E-05 | 2.10E-05 | 2.10E-05 |
| WT AL-5        | 2.10E-05        | 2.10E-05 | 2.10E-05 | 2.10E-05 |
| WT AL-6        | 2.10E-05        | 2.10E-05 | 2.10E-05 | 2.10E-05 |
| WT AL-7        | 2.10E-05        | 2.10E-05 | 2.10E-05 | 2.10E-05 |
| KO AL-1        | 0.115566        | 0.037423 | 0.053022 | 0.103478 |
| KO AL-2        | 0.445631        | 0.03416  | 8.63E-04 | 0.310391 |
| KO AL-3        | 2.10E-05        | 2.10E-05 | 2.10E-05 | 2.10E-05 |
| KO AL-4        | 2.10E-05        | 2.10E-05 | 2.10E-05 | 2.10E-05 |
| KO AL-5        | 0.114629        | 0.018546 | 0.001497 | 0.151738 |
| KO AL-6        | 0.773966        | 0.784898 | 0.857887 | 0.79033  |
| Liver-RE AL-1  | 0.09213         | 2.03E-04 | 2.10E-05 | 0.023735 |
| Liver-RE AL-2  | 0.008704        | 3.06E-04 | 9.77E-05 | 0.002244 |
| Liver-RE AL-3  | 0.539153        | 0.104449 | 0.030446 | 0.309583 |
| Liver-RE AL-4  | 0.024415        | 0.010494 | 4.27E-04 | 0.022284 |
| Liver-RE AL-5  | 6.00E-05        | 2.10E-05 | 2.10E-05 | 4.15E-05 |
| Muscle-RE AL-1 | 0.309583        | 0.029895 | 1.52E-04 | 0.462835 |
| Muscle-RE AL-2 | 0.001303        | 6.00E-05 | 4.15E-05 | 3.21E-04 |
| Muscle-RE AL-3 | 0.061446        | 0.01168  | 0.049686 | 0.025008 |
| Muscle-RE AL-4 | 0.046623        | 0.011672 | 0.091993 | 0.032164 |
| Muscle-RE AL-5 | 2.10E-05        | 2.10E-05 | 0.015376 | 2.10E-05 |
| LMRE AL-1      | 0.58761         | 0.559415 | 0.622274 | 0.585451 |
| LMRE AL-2      | 0.610096        | 0.254953 | 0.298054 | 0.521928 |
| LMRE AL-3      | 0.750948        | 0.513127 | 0.781277 | 0.790553 |
| LMRE AL-4      | 0.830686        | 0.013048 | 1.35E-04 | 0.657605 |
| LMRE AL-5      | 0.394516        | 0.349102 | 0.091993 | 0.422235 |
| LMRE AL-6      | 8.63E-04        | 3.35E-04 | 1.86E-04 | 8.26E-04 |
| LMRE AL-7      | 0.823998        | 0.156601 | 0.021568 | 0.628787 |

## Figure S1. Characterization of muscle and liver+muscle clock reconstituted mice.

### Related to Figure 1.

(A) Whole-cell lysates (WCL) collected at zeitgeber time (ZT) 4. ZT0 = lights on, ZT12 = lights off. BAT – brown adipose tissue; muscle – gastrocnemius muscle. WT is WT-*Hsa-Cre*.

(B) Top, nuclear protein extracts from gastrocnemius muscle collected at the indicated time points. WT is WT-*Hsa-Cre*. Bottom, densitometry quantification of BMAL1, n=3. Total BMAL1 was normalized to p84 loading control.

(C) RFP staining for mCherry in transverse sections of gastrocnemius muscle. Left-representative images, red – mCherry, blue – DAPI. Scale bar- 100µm. Right- signal intensity of mCherry within each fibre, minimum 100 fibers counted per mouse.

Individual mice, n = 4 (WTs #1 and #4 are WT-*Alfp-Cre*, WTs #2 and #3 are WT-*Alfp+Hsa-Cre*).

(D) Whole-cell lysates (WCL) collected at ZT4. SCN – suprachiasmatic nucleus enriched tissue punch from hypothalamus. WT is WT-*Alfp+Hsa-Cre*.

(E) Quantitative PCR of *Bmal1* expression confirming loss of expression in *Bmal1* KO mice, n=3-6. Liver WT is WT-*Alfp-Cre*. Muscle WT is WT-*Hsa-Cre*.

(F) Rhythmicity analysis of metabolic cage parameters using BioDare2. Values are p-value for each parameter for each mouse for a ~24 h period rhythm. Orange-highlighted = p<0.01. WT-*Alfp-Cre* = 2; WT-*Hsa-Cre* = 1; WT-*Alfp-Cre* and WT-*Hsa-Cre* = 4. VO<sub>2</sub> – oxygen consumption rate; VCO<sub>2</sub> – carbon dioxide release rate; EE – energy expenditure; RER – respiratory exchange ratio.

**A**

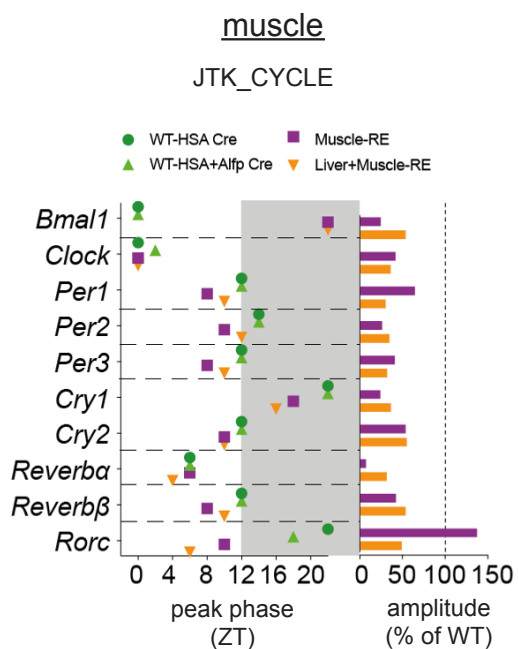

**B**

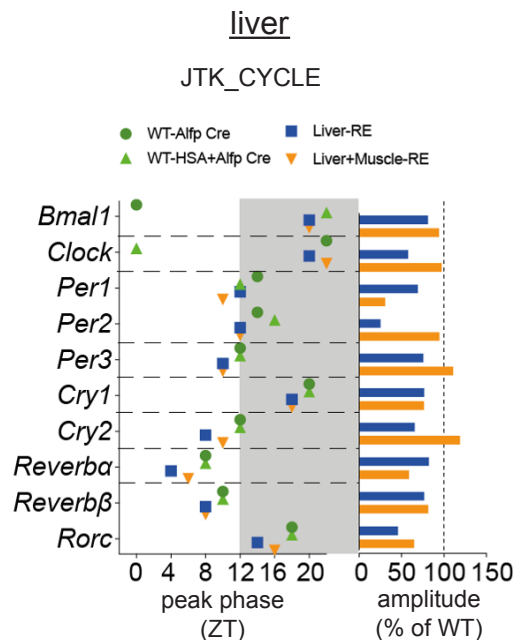

**C**

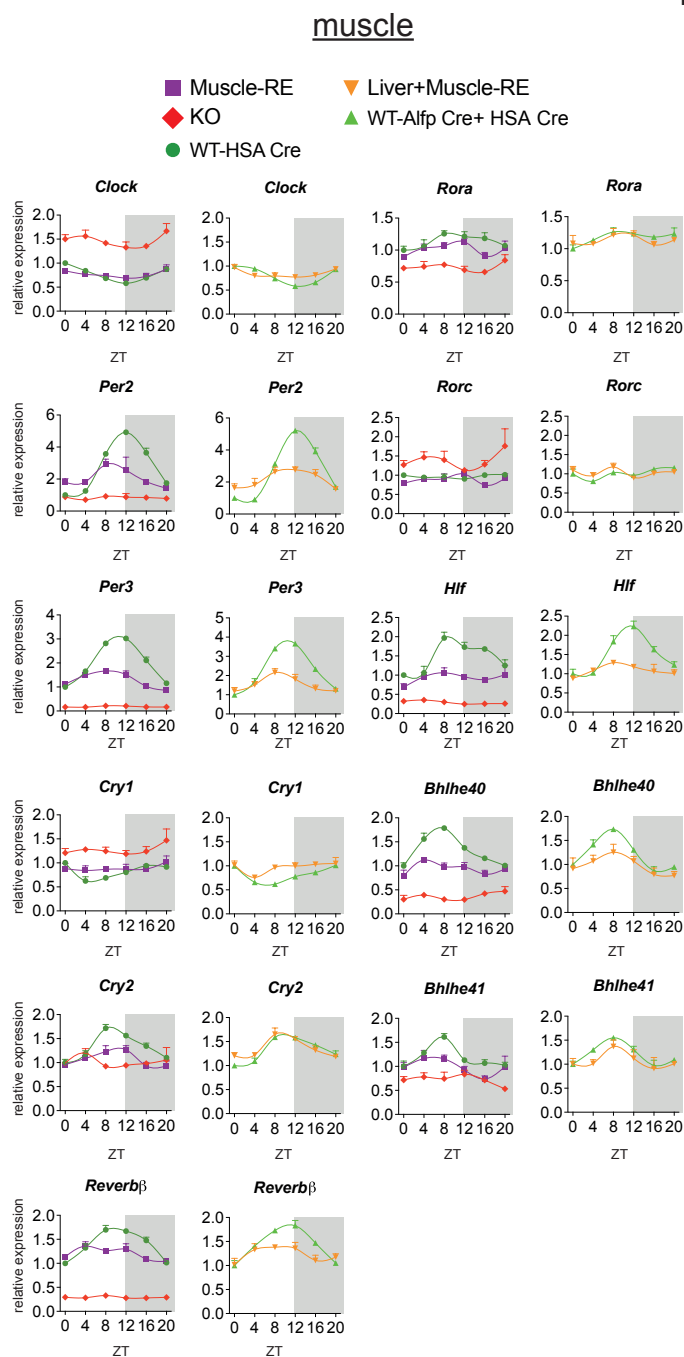

**D**

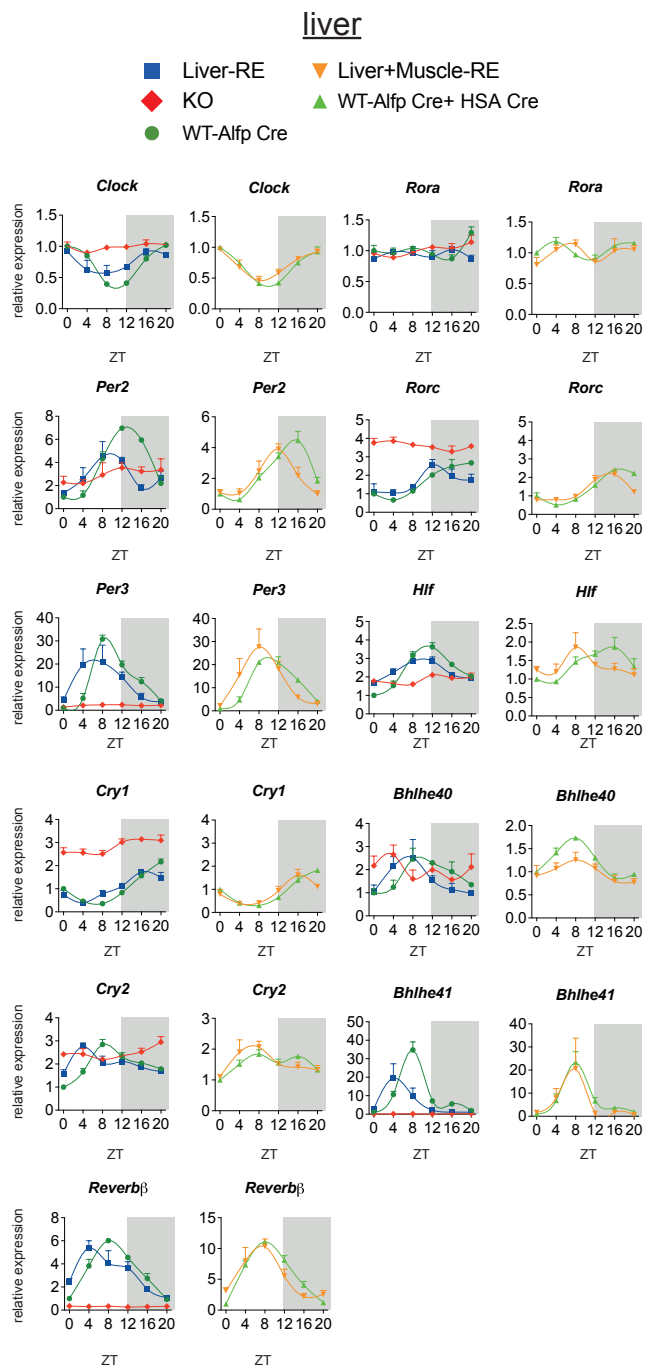

**Figure S2. Oscillation of clock genes in single and double RE mice. Related to Figure 2.**

(A-D) RNA sequencing of gastrocnemius muscle (A) and liver (B) harvested around the clock under 12 h light/12 h dark conditions, n=3. ZT – zeitgeber time; ZT0 = lights on; ZT12 = lights off. Data are normalized to WT ZT0 to facilitate comparisons across all genotypes.

(A and B) Amplitude and phase of clock genes as determined by JTK\_CYCLE.

(C and D) Expression of clock genes.

**A**

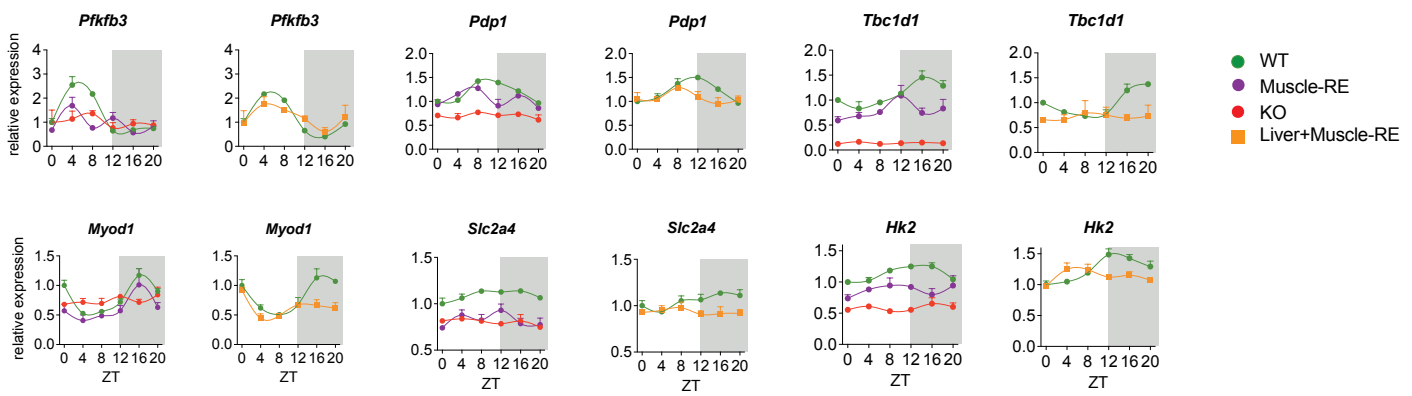

**B**

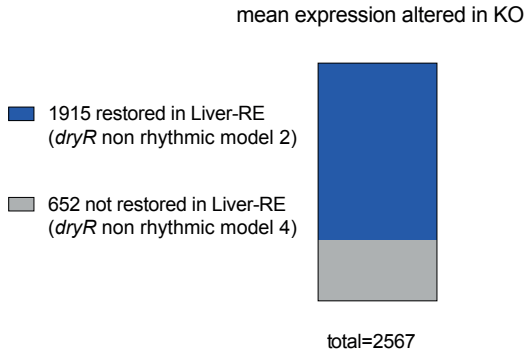

**C**

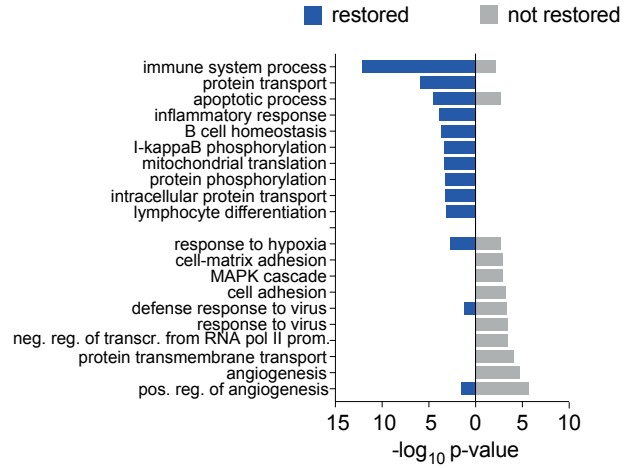

**D**

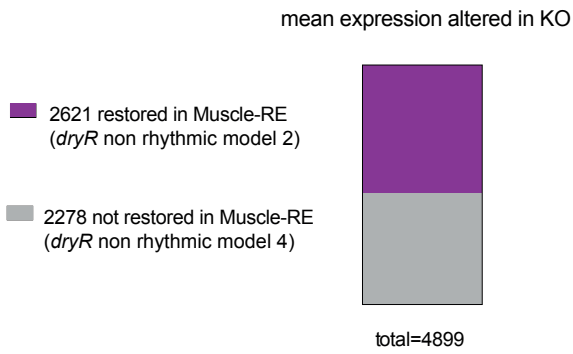

**E**

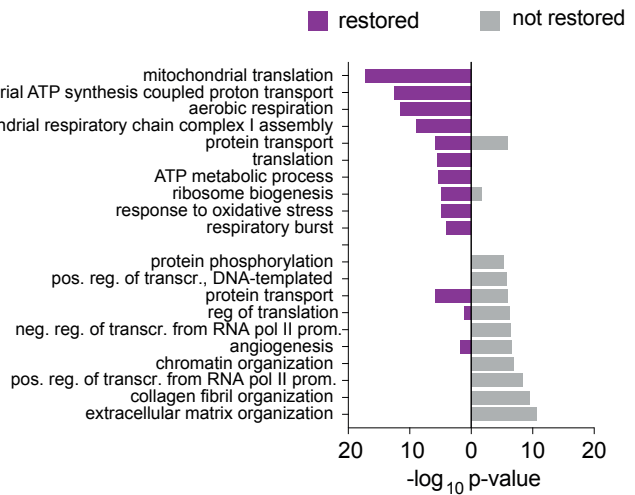

**F**

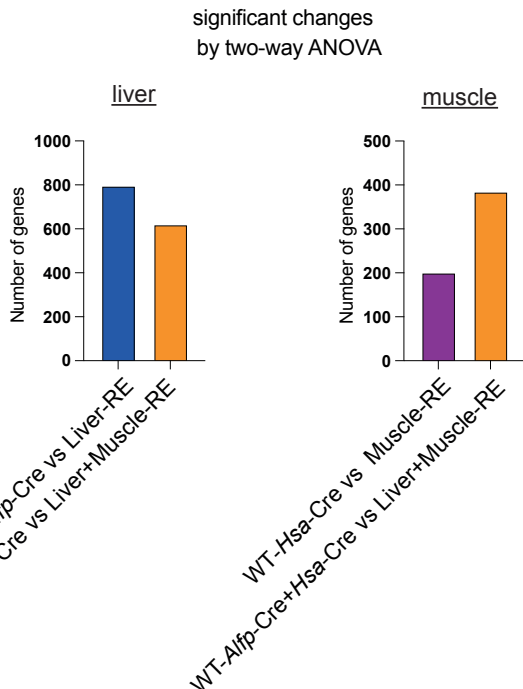

**G**

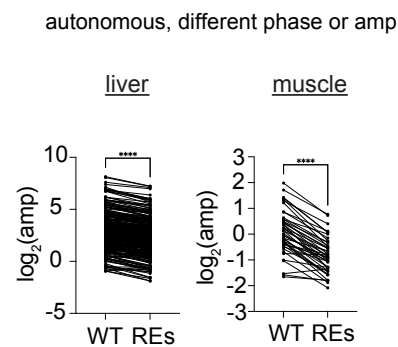

**Figure S3. Analysis of diurnal transcriptomes in liver and muscle. Related to Figure 3.**

(A) Example genes in muscle involved in glucose metabolism (*Pfkfb3*, *Pdp1*, *Slc2a4*, *Tbc1d1*, *Hk2*) or muscle development (*Myod1*).

(B and D) *dryR* mean models were used to compare daily average expression of genes that did not oscillate in any genotype. See also Tables S3 and S4.

(C and E) Pathway enrichments for non-oscillating genes with daily average expression changes which were either restored or not restored in single RE mice.

(F) Genome wide changes in single RE and double RE mice in muscle and liver as assessed using two-way ANOVA ( $p < 0.01$ ) via Nitecap analysis.

(G) Amplitude comparison of genes oscillating autonomously with altered phase or amplitude. Muscle data, two-tailed paired *t*-test, \*\*\*\* $p < 0.0001$ . Liver data, Wilcoxon test (non-normal distribution), \*\*\*\* $p < 0.0001$ .

**A**

*dryR*  
muscle

■ WT and Muscle-RE only (model 72)

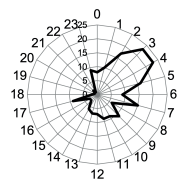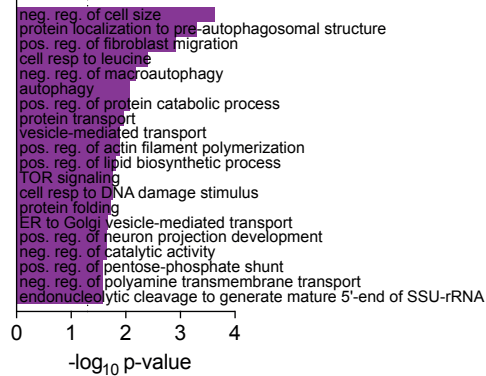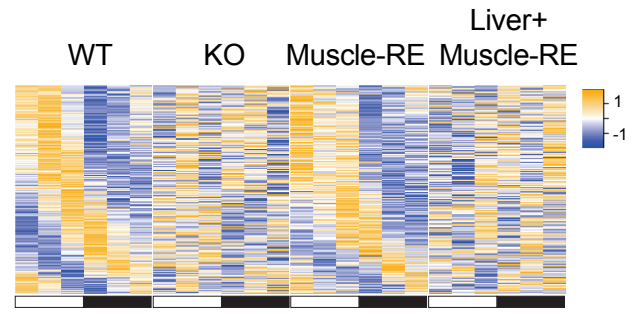

**B**

*dryR*  
liver

■ WTs and Liver-RE only (model 67)

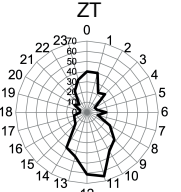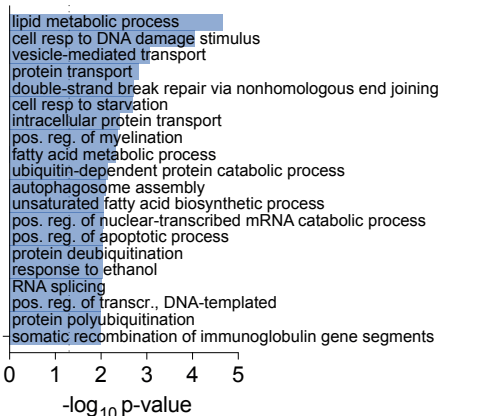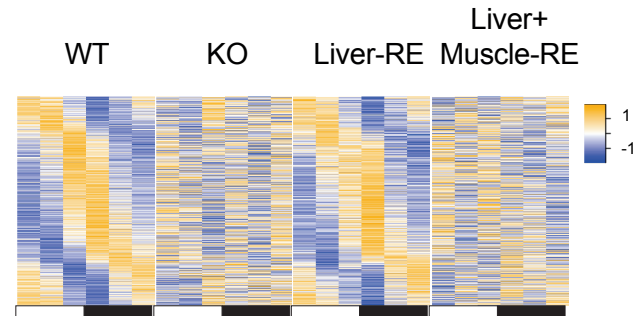

**C**

*dryR*  
muscle

■ all genotypes (model 152)

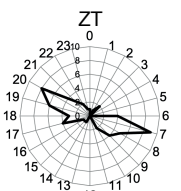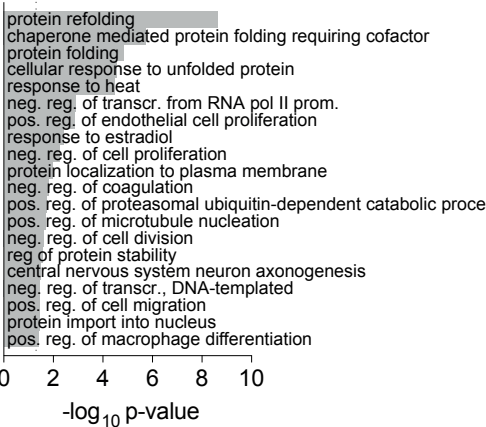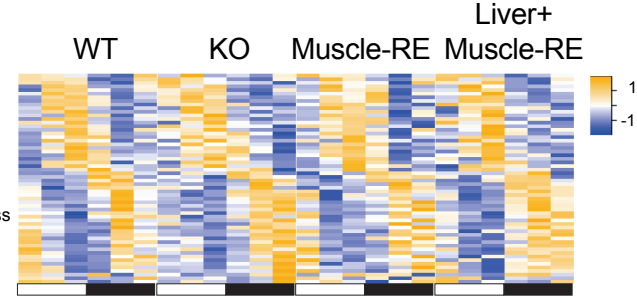

**D**

*dryR*  
liver

■ all genotypes (model 152)

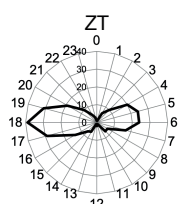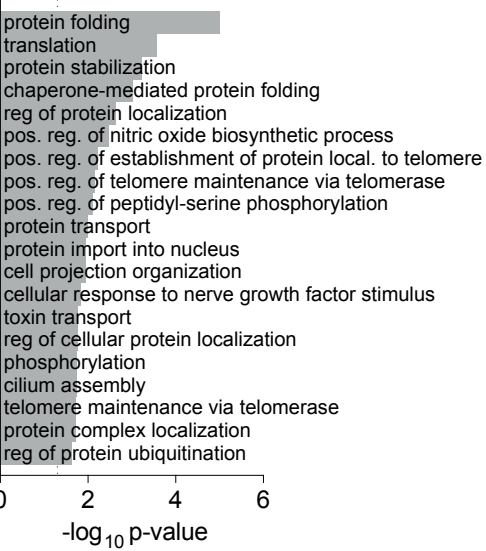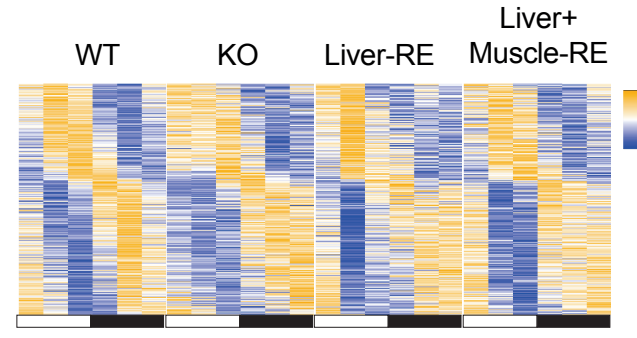

**Figure S4. Comparison of oscillating genes across genotypes. Related to Figure 4.**

(A-D) *dryR* analysis of RNA sequencing data. Left, polar histogram showing peak phases. Middle, DAVID biological process gene ontology enrichments. Right, heatmaps of group averages sorted by peak phase. Data from double Cre-positive WT mice are presented.

(A and B) a *dryR* model of genes oscillating exclusively in WT and single, but not double, reconstituted mice.

(C and D) a *dryR* model of genes oscillating in all genotypes.



**A**

females

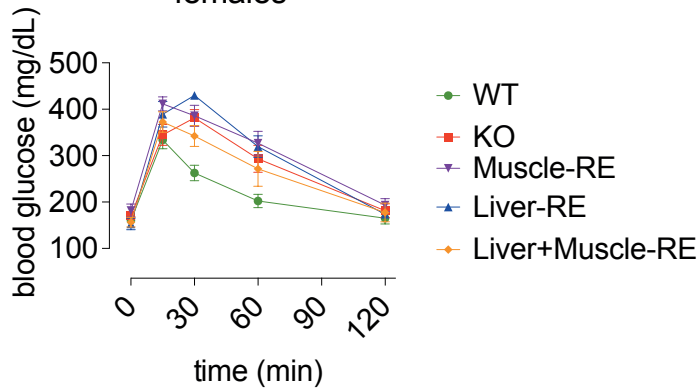

**B**

males

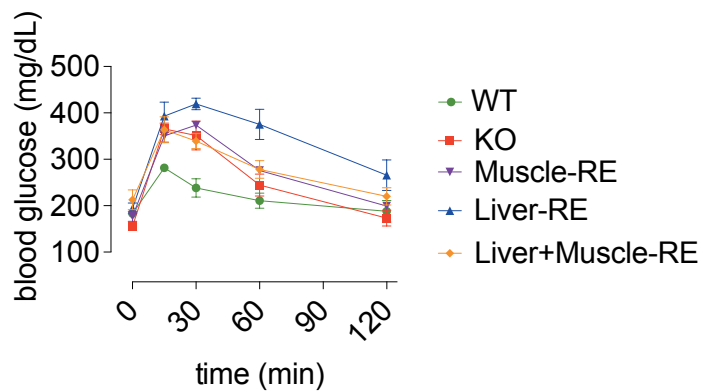

**Figure S5. *Ad libitum* glucose tolerance tests. Related to Figure 5.**

(A and B) Raw data for *ad libitum* oral glucose tolerance tests in female (left) and male (right) mice.



**Figure S6. Effects of night feeding on RE mice. Related to Figure 6.**

(A) Body weight change from *ad libitum* baseline through 2 weeks of night feeding, n=6-16 (WTs are 7 WT-*Hsa-Cre*, 1 WT-*Alfp-Cre*, 3 WT-*Alfp+Hsa-Cre*). One-way ANOVA with Fisher's LSD, \* p<0.05, \*\* p<0.01.

(B) Mean RER recorded after 2 weeks of night feeding, n=4-7 (WTs are 1 WT-*Hsa-Cre*, 2 WT-*Alfp-Cre*, 4 WT-*Alfp+Hsa-Cre*).

(C) Rhythmicity analysis of metabolic cage parameters using BioDare2. Values are p-value for each parameter for each mouse for a ~24 h period rhythm. Orange-highlighted = p<0.01. VO<sub>2</sub> – oxygen consumption rate; VCO<sub>2</sub> – carbon dioxide release rate; EE – energy expenditure; RER – respiratory exchange ratio.

(D) RNA-Seq data from AL and NF mice at ZT4 and ZT16 in gastrocnemius muscle (top) and liver (bottom), n = 3-6. For AL, single RE or KO mice were normalized to the *Alfp-Cre*- or *Hsa-Cre*- positive WT control, and double RE mice were normalized to the *Alfp+Hsa-Cre*-positive WT control. For clarity, only double Cre WT is shown in AL panel. For NF WTs (WT-*Alfp-Cre* = 2; WT-*Hsa-Cre* = 2; WT-*Alfp+Hsa-Cre* = 2). *Nr1d1* is replicated from the main figure for comparison with liver here. Two-way ANOVA, Bonferroni's post-hoc test, \*p< 0.05, \*\* p<0.01, \*\*\*\* p<0.0001, ns = not significant.

**A**

NF

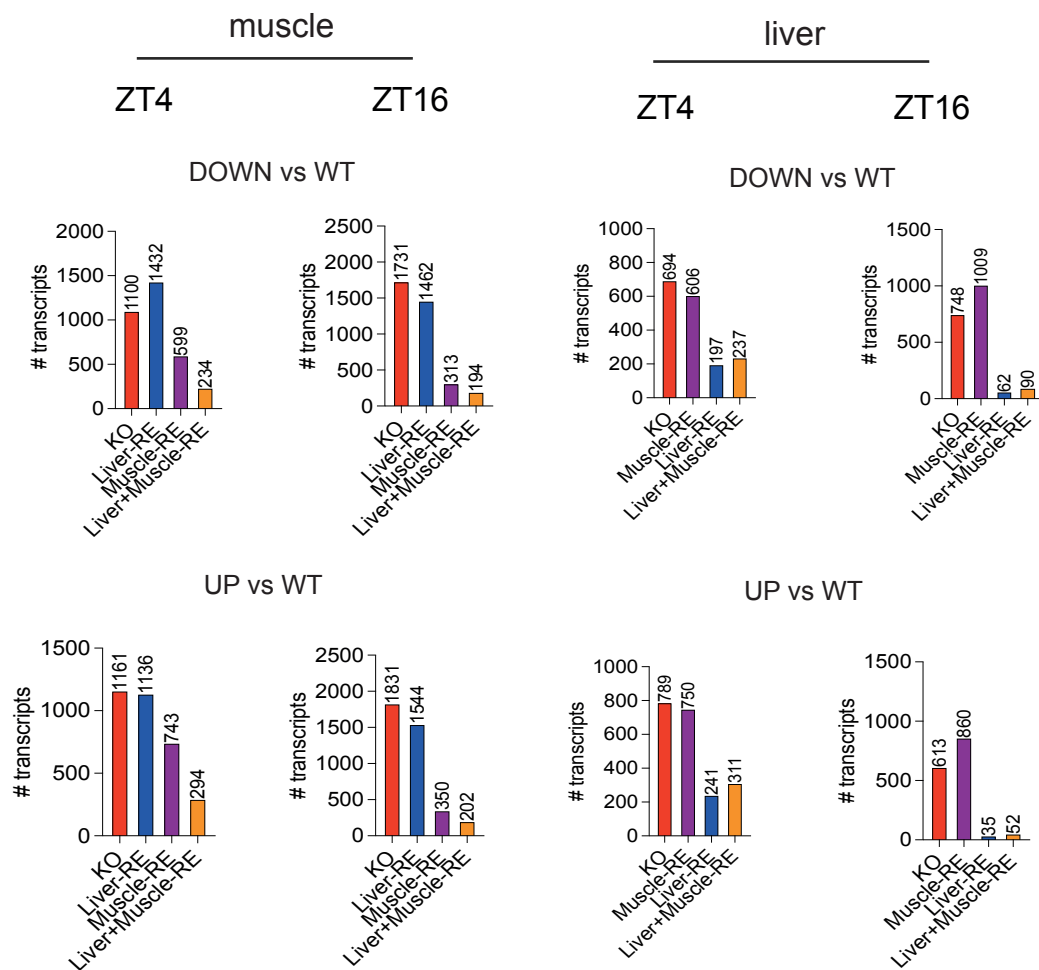

**B**

NF

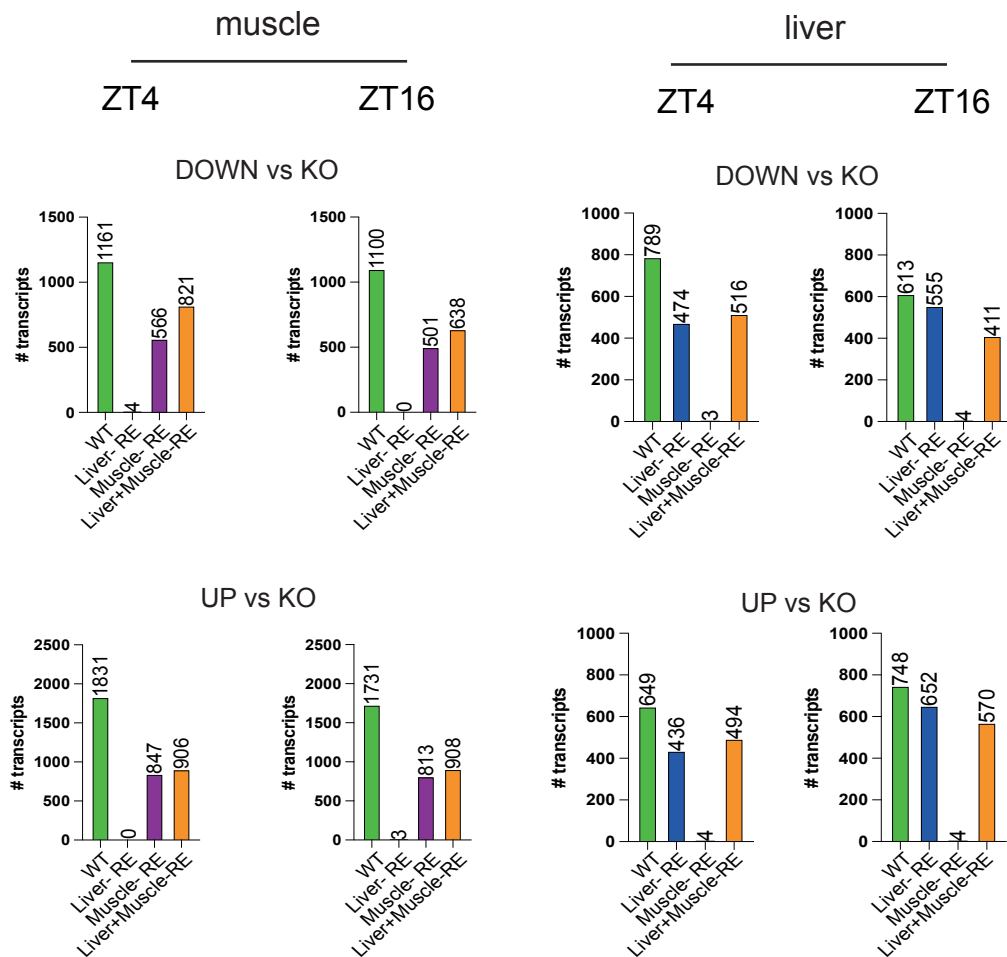

**Figure S7. Transcriptional effects of night feeding in RE mice. Related to Figure 6.**

(A and B) Genome-wide changes under night feeding at ZT4 and ZT16 in gastrocnemius muscle and liver versus WT. n= 3-6, WTs are 2 WT-*Alfp*-Cre, 2 WT-*Hsa*-Cre, 2 WT-*Alfp+Hsa*-Cre. Significant differences were calculated by DESeq2 (FDR<0.05).

A

B

muscle- NF ZT4

Liver+Muscle-RE vs Muscle-RE

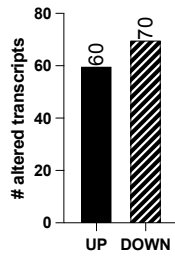

muscle- NF ZT4  
upregulated in Liver+Muscle-RE vs Muscle-RE

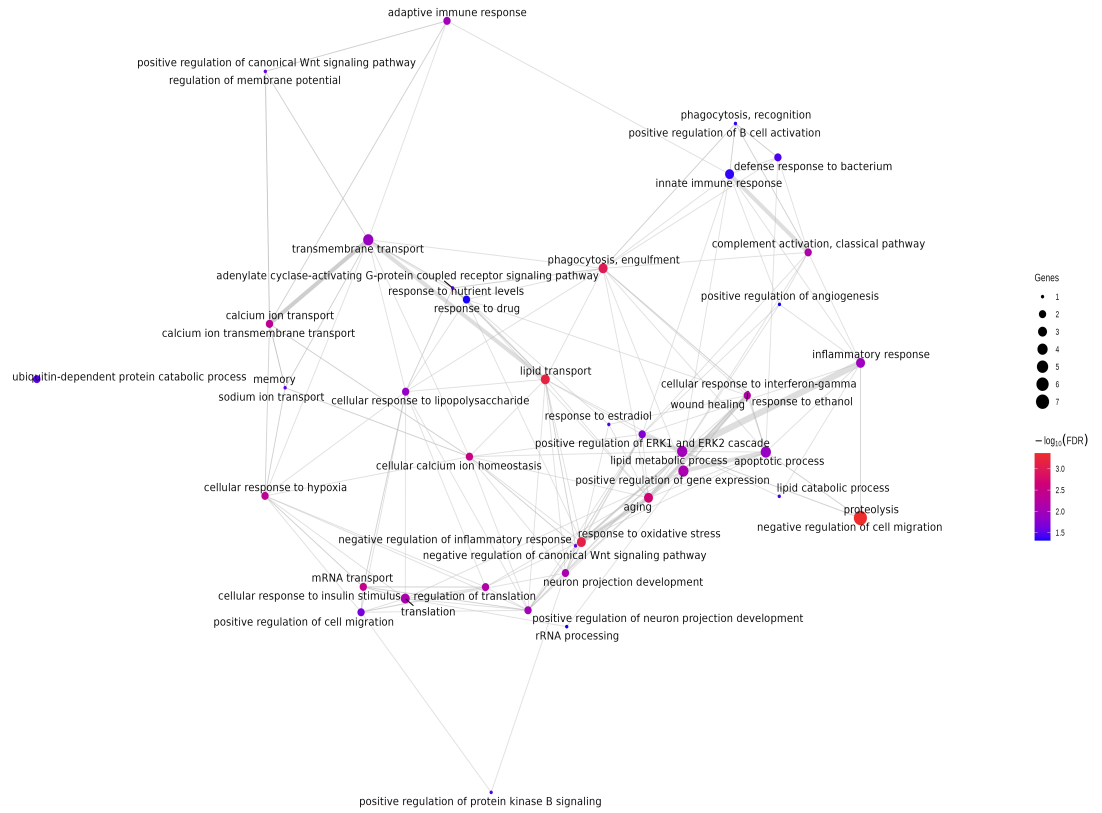

muscle- NF ZT4  
downregulated in Liver+Muscle-RE vs Muscle-RE

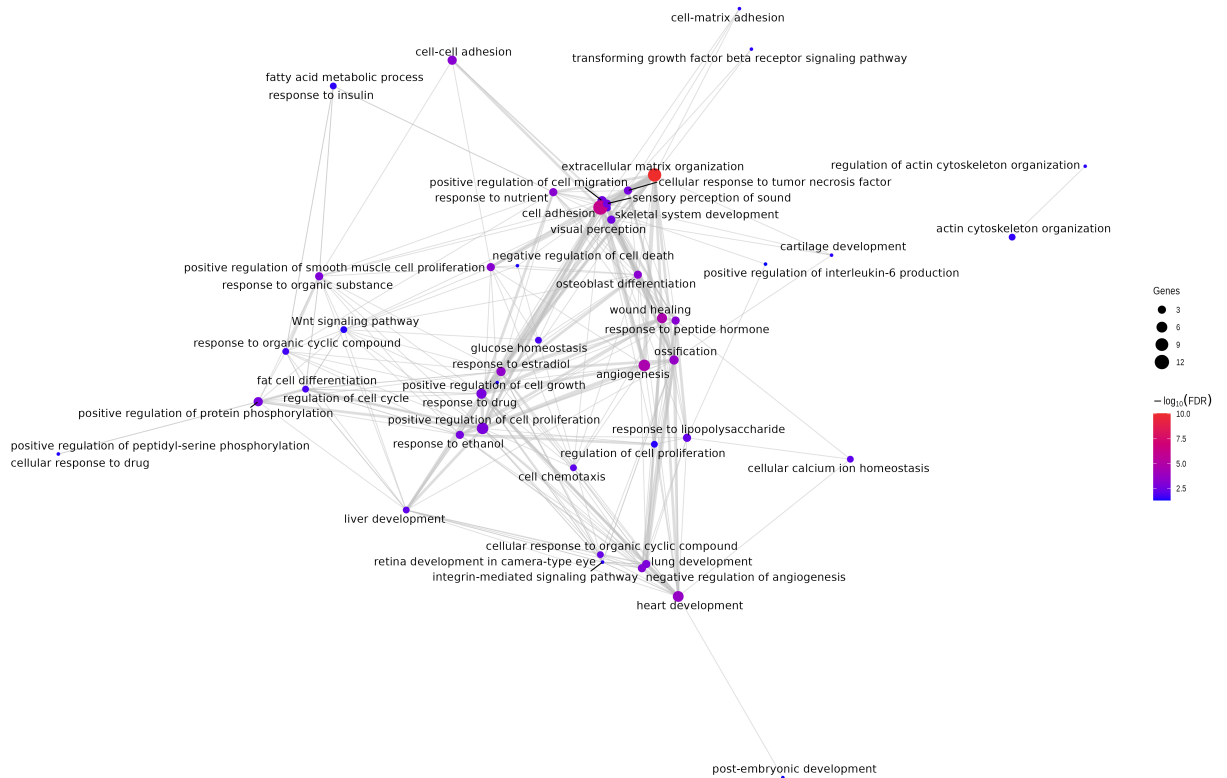

**Figure S8. Transcriptional changes in Muscle-RE vs Liver+Muscle-RE muscle under night feeding. Related to Figure 6.**

(A) Number of genes altered under night feeding at ZT4 in gastrocnemius Liver+Muscle-RE vs Muscle-RE. Significant differences were calculated by DESeq2 (FDR<0.05).

(B) Network gene ontology enrichment analysis for biological process of genes altered under night feeding at ZT4 in gastrocnemius Liver+Muscle-RE vs Muscle-RE. Single nodes without connections were excluded.



**A**

JTK\_CYCLE- muscle

'WT only' circadian genes peaking at ZT4

AL NF

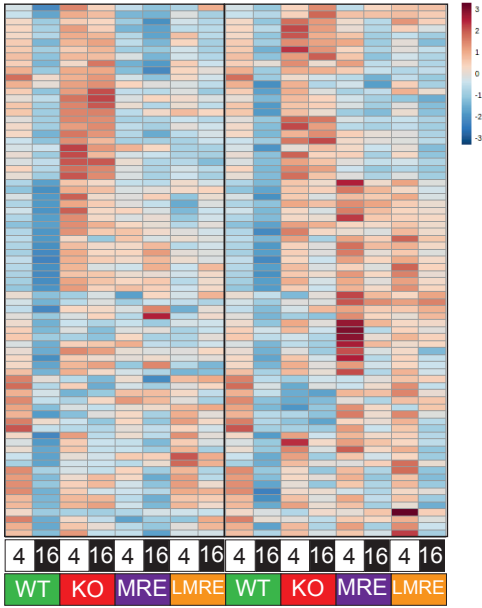

ZT 4 16 4 16 4 16 4 16 4 16 4 16 4 16  
 WT KO MRE LMRE WT KO MRE LMRE

significant within genotype 56 5 15 8  
 significant ZT4 vs WT NF 4 26 23 13  
 significant ZT16 vs WT NF 16 57 23 22

KO rescued under NF

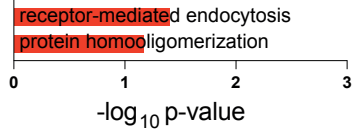

Muscle-RE rescued under NF

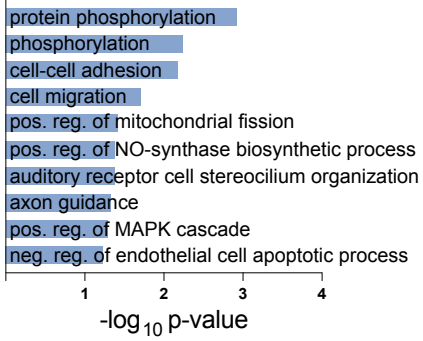

Liver+Muscle-RE rescued under NF

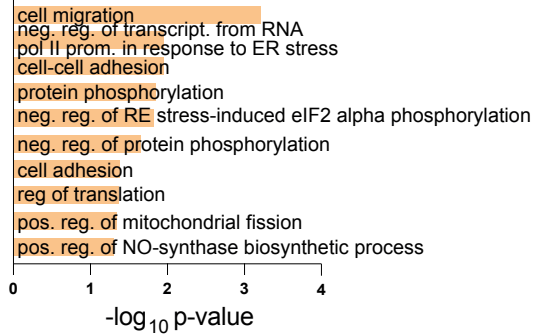

**B**

JTK\_CYCLE- muscle

'WT only' circadian genes peaking at ZT16

AL NF

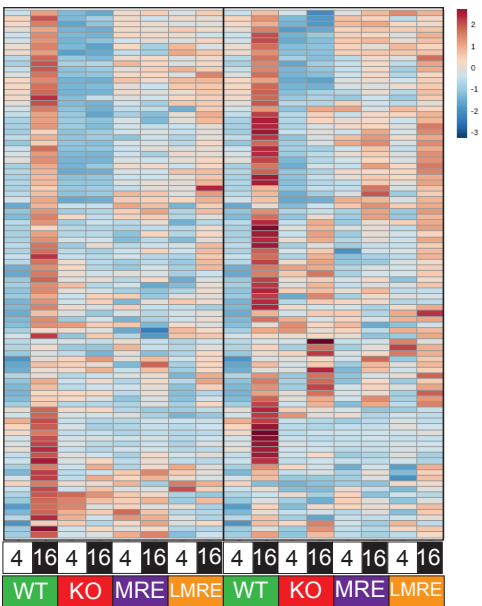

ZT 4 16 4 16 4 16 4 16 4 16 4 16 4 16  
 WT KO MRE LMRE WT KO MRE LMRE

significant within genotype 76 13 15 12  
 significant ZT4 vs WT NF 4 33 15 9  
 significant ZT16 vs WT NF 16 51 36 20

KO rescued under NF

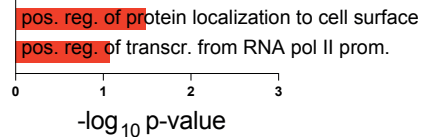

Muscle-RE rescued under NF

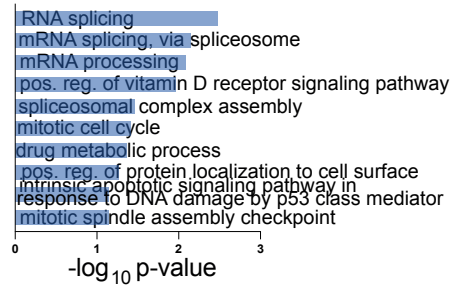

Liver+Muscle-RE rescued under NF

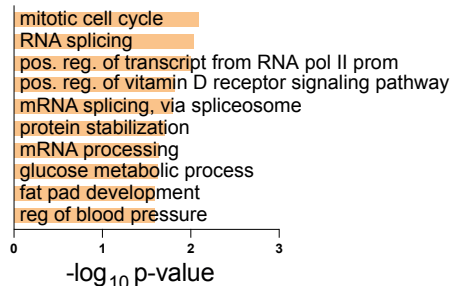

**Figure S9. Transcriptional effects of night feeding on circadian and non-circadian genes in muscle RE mice. Related to Figure 6.**

(A and B) Effect of night feeding on genes classified using JTK Venn diagram overlap approach (JTK  $p < 0.01$  for classifications within each genotype) as only oscillating in WT gastrocnemius muscle (WT-*Hsa-Cre* and WT-*Alfp+Hsa-Cre*) under ad libitum feeding conditions and peaking between ZT2-6 (A) or ZT14-18 (B). To display on heatmap, single RE and KO mice under AL are normalized to single Cre WT control, double-RE mice under AL are normalized to double Cre WT control. For clarity, only double Cre WT is shown in AL panel. For both AL and NF, data is displayed as relative to WT controls within that feeding condition. Only genes detected as significantly different by DESeq2 (FDR<0.05) were included. DAVID gene ontology for biological process was performed on the subset of genes which were not significantly different from WT at each timepoint.

muscle

□ ZT4  
 ■ ZT16

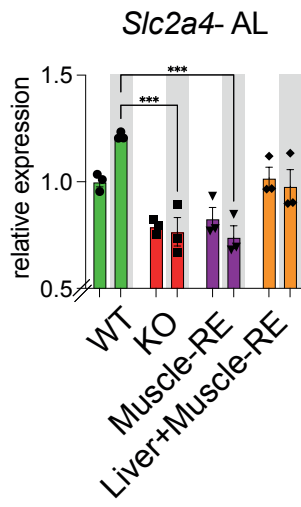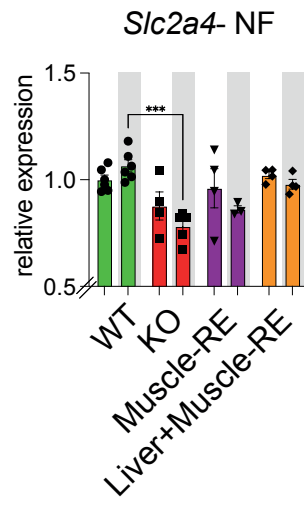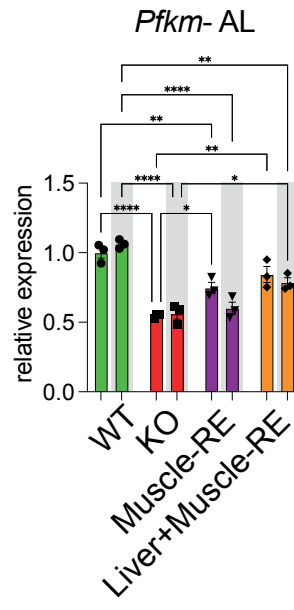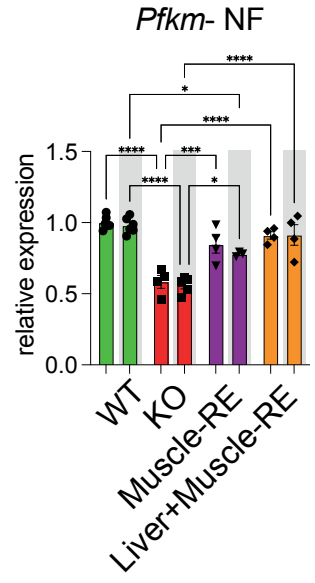

**Figure S10. Example non-circadian genes in gastrocnemius muscle under night feeding. Related to Figure 6.**

(A) RNA-Seq data from AL and NF mice at ZT4 and ZT16, n = 3-6. For AL, single RE and KO mice are normalized to single Cre WT control, double-RE mice are normalized to double Cre WT control. For clarity, only double Cre WT is shown in AL panel. Two-way ANOVA, Bonferroni's post-hoc test, \* p<0.05, \*\* p<0.01, \*\*\* p<0.001, \*\*\*\* p<0.0001.

**A**

liver

*dryR* 'WT only'  
circadian genes

AL NF

ZT4  
high

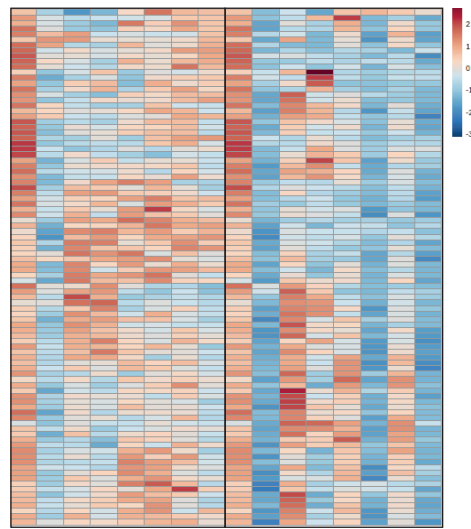

ZT 4 16 4 16 4 16 4 16 4 16 4 16  
WT KO LRE LMRE WT KO LRE LMRE

significant within genotype 94 13 30 30  
significant ZT4 vs WT NF 4 15 9 6  
significant ZT16 vs WT NF 16 15 2 0

KO rescued under NF

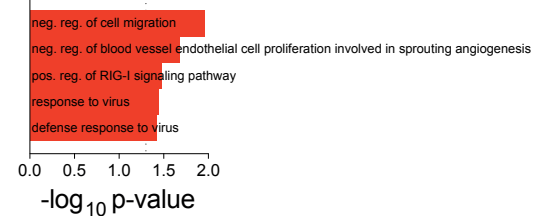

Liver-RE rescued under NF

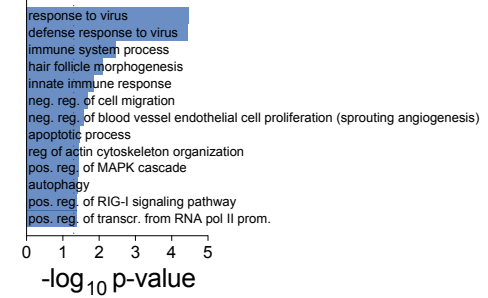

Liver+Muscle-RE rescued under NF

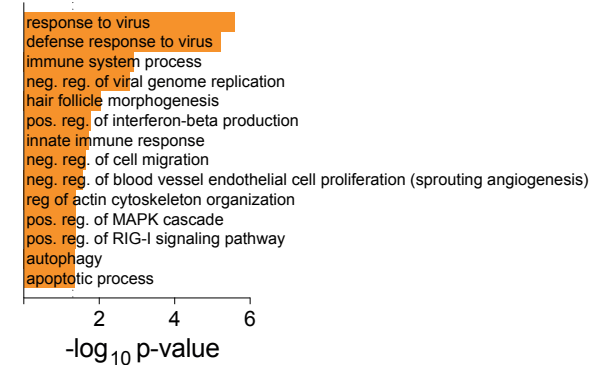

**B**

liver

*dryR* 'WT only'  
circadian genes

AL NF

ZT4  
low

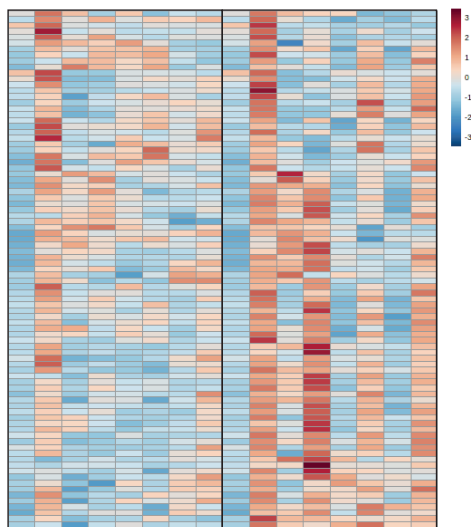

ZT 4 16 4 16 4 16 4 16 4 16 4 16  
WT KO LRE LMRE WT KO LRE LMRE

significant within genotype 87 16 38 30  
significant ZT4 vs WT NF 4 18 2 5  
significant ZT16 vs WT NF 16 19 5 4

KO rescued under NF

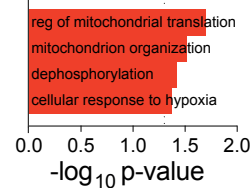

Liver-RE rescued under NF

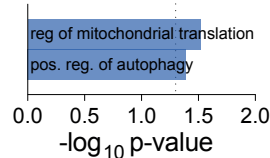

Liver+Muscle-RE rescued under NF

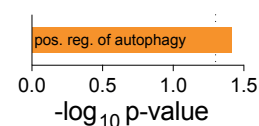

**Figure S11. Transcriptional effects of night feeding on circadian and non-circadian genes in liver in RE mice using *dryR*. Related to Figure 6.**

(A and B) Effect of night feeding on genes classified using DryR as only oscillating in WT liver (WT-*Alfp*-Cre and WT-*Alfp*+*Hsa*-Cre) under ad libitum feeding conditions. To display on heatmap, single RE and KO mice under AL are normalized to single Cre WT control, double-RE mice under AL are normalized to double Cre WT control. For clarity, only double Cre WT is shown in AL panel. For both AL and NF, data is displayed as relative to WT controls within that feeding condition. Only genes detected as significantly different by DeSeq2 (FDR<0.05) were included. DAVID gene ontology for biological process was performed on the subset of genes which were not significantly different from WT at each timepoint.

**A**

liver

JTK\_CYCLE 'WT only' circadian genes peaking at ZT4

AL NF

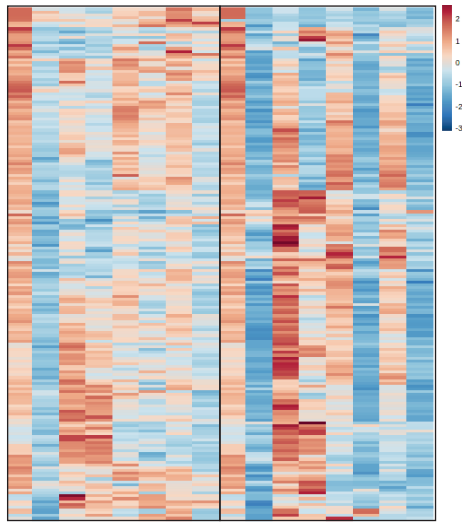

ZT 4 16 4 16 4 16 4 16 4 16 4 16 4 16  
 WT KO LRE LMRE WT KO LRE LMRE

|                              |     |    |    |    |
|------------------------------|-----|----|----|----|
| significant within genotype  | 140 | 60 | 82 | 80 |
| significant ZT4 vs WT NF 4   |     | 30 | 6  | 4  |
| significant ZT16 vs WT NF 16 |     | 44 | 2  | 3  |

KO rescued under NF

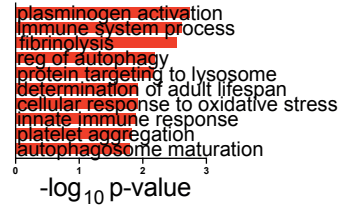

Liver-RE rescued under NF

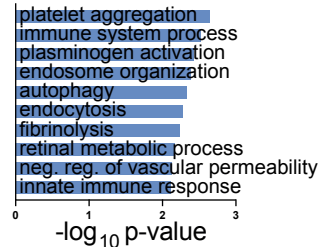

Liver+Muscle-RE rescued under NF

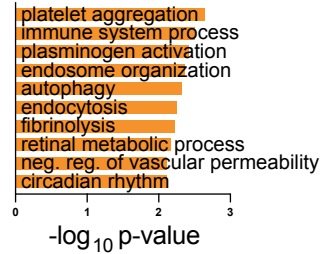

**B**

liver

JTK\_CYCLE 'WT only' circadian genes peaking at ZT16

AL NF

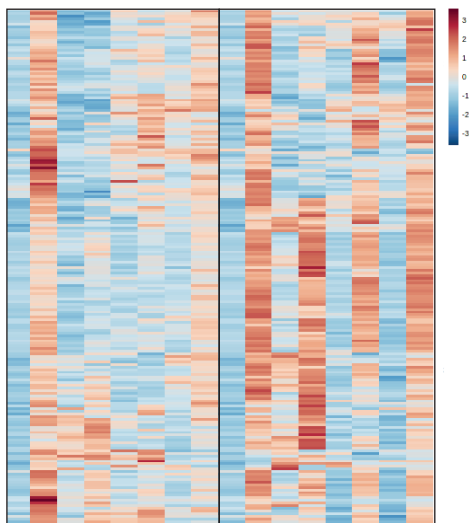

ZT 4 16 4 16 4 16 4 16 4 16 4 16 4 16  
 WT KO LRE LMRE WT KO LRE LMRE

|                              |     |    |     |     |
|------------------------------|-----|----|-----|-----|
| significant within genotype  | 169 | 43 | 108 | 108 |
| significant ZT4 vs WT NF 4   |     | 39 | 20  | 23  |
| significant ZT16 vs WT NF 16 |     | 61 | 1   | 1   |

KO rescued under NF

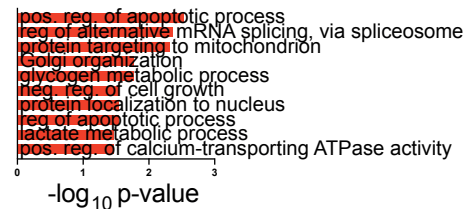

Liver-RE rescued under NF

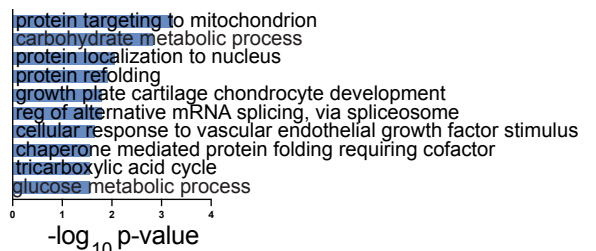

Liver+Muscle-RE rescued under NF

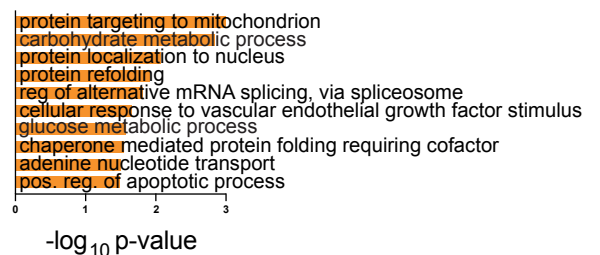

**Figure S12. Transcriptional effects of night feeding on circadian and non-circadian genes in liver in RE mice using JTK\_CYCLE. Related to Figure 6.**

(A and B) Effect of night feeding on genes classified using JTK Venn diagram overlap approach (JTK  $p < 0.01$  for classifications within each genotype) as only oscillating in WT liver (WT-*Alfp*-Cre and WT-*Alfp*+*Hsa*-Cre) under ad libitum feeding conditions and peaking between ZT2-6 (A) or ZT14-18 (B). To display on heatmap, single RE and KO mice under AL are normalized to single Cre WT control, double-RE mice under AL are normalized to double Cre WT control. For clarity, only double Cre WT is shown in AL panel. For both AL and NF, data is displayed as relative to WT controls within that feeding condition. Only genes detected as significantly different by DESeq2 (FDR<0.05) were included. DAVID gene ontology for biological process was performed on the subset of genes which were not significantly different from WT at each timepoint.



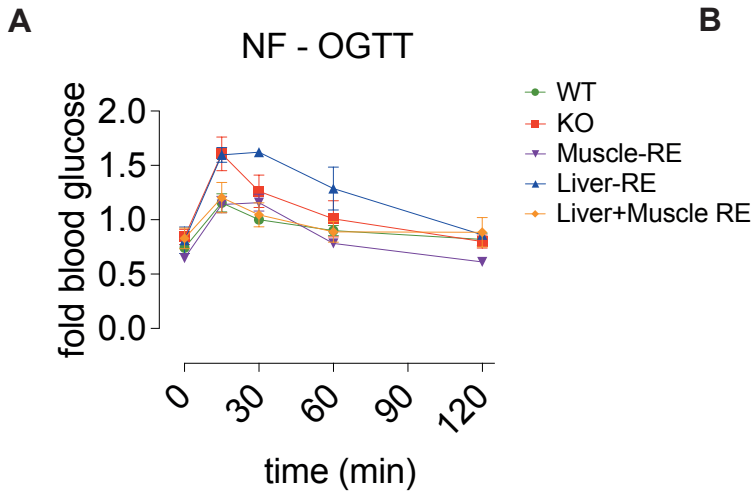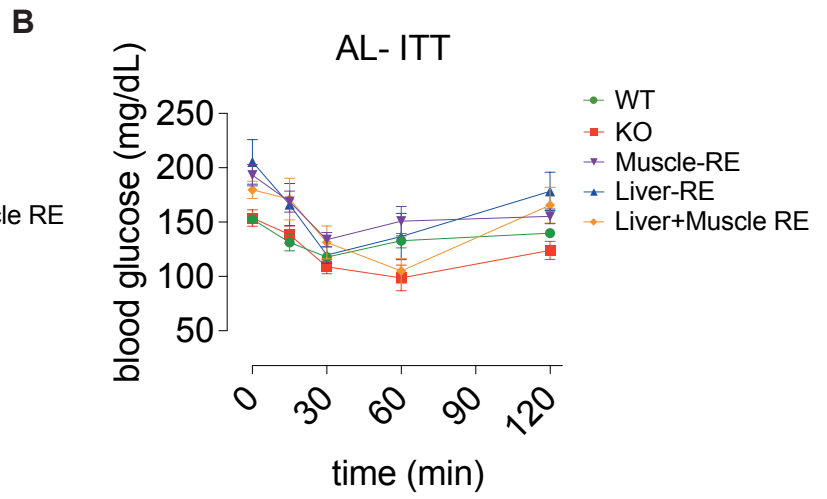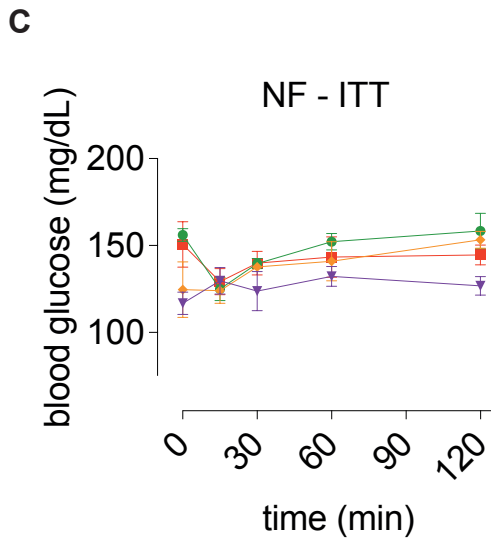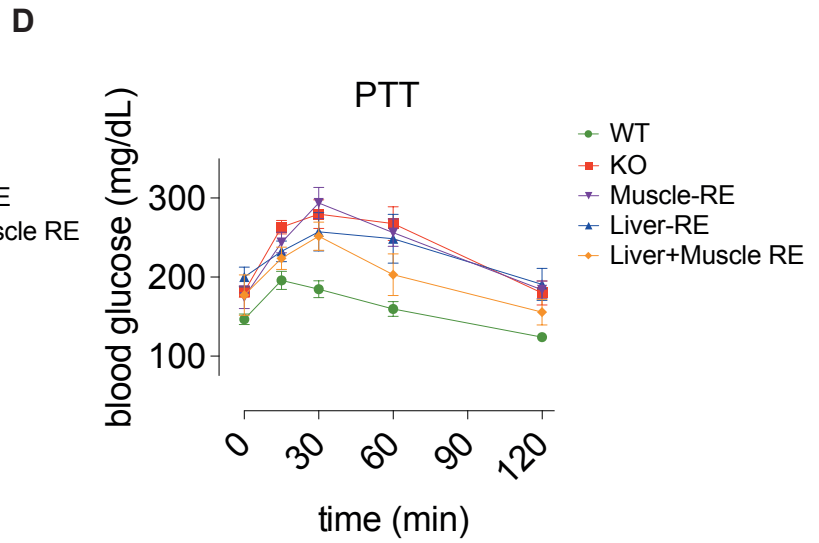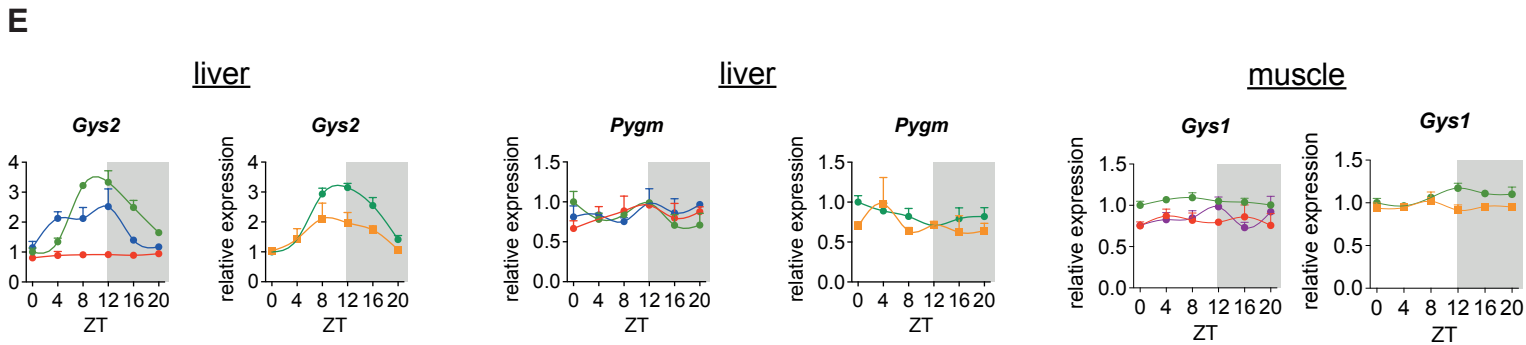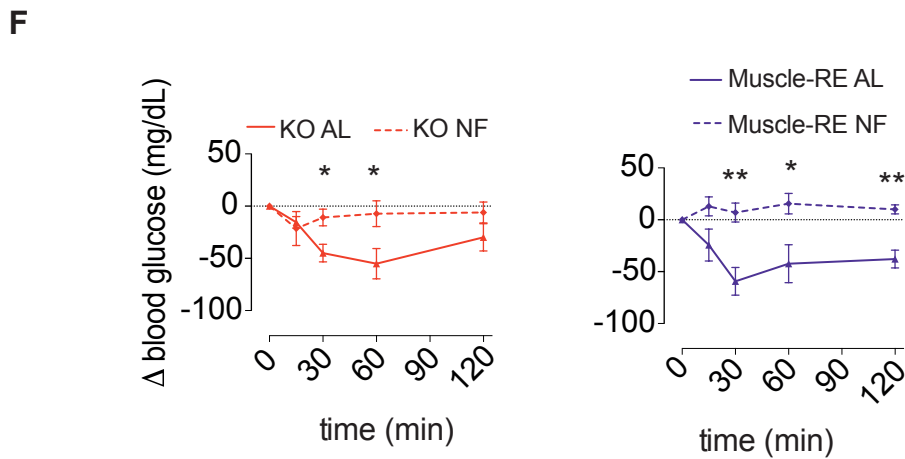

**Figure S13. Metabolic tests in RE mice. Related to Figure 7.**

(A) Raw data for night feeding oral glucose tolerance tests.

(B) Raw data for *ad libitum* insulin glucose tolerance tests.

(C) Raw data for night feeding insulin tolerance tests.

(D) Raw data for *ad libitum* pyruvate/lactate tolerance tests.

(E) Expression of gene related to glycogen metabolism. Data are normalized to WT ZT0.
